# Supplementary material
Source: PubMed Central journal article supplement (PMC3559234)
Supplement: Supp_Data.pdf [file Supp_Data.pdf]

## Supplementary Data

### **Pig 1**

#### *Right ear*

Focally within the subcutis is a small, unencapsulated, well-demarcated neoplasm composed of nests and packets of neoplastic cells on a fine fibrovascular stroma. Neoplastic cells are polygonal, with variably distinct cell borders and moderate-to-large amounts of pale eosinophilic vacuolated cytoplasm. Nuclei are round to oval to irregular and vesicular, with generally 1–3 prominent magenta nucleoli. Anisocytosis and anisokaryosis are moderate, and mitoses are 8 in 10 high-power fields (hpf) and occasionally bizarre. At the periphery of the neoplasm, adjacent to a small vessel, are small numbers of lymphocytes.

#### *Left ear*

Within the deep dermis, subcutis, and skeletal muscle, there is an unencapsulated, moderately demarcated and infiltrative neoplasm composed of nests and short streams of neoplastic cells on a scant fibrovascular stroma. Neoplastic cells are polygonal to spindloid, with indistinct cell borders and a small-to-moderate amount of vacuolated eosinophilic cytoplasm. Nuclei are oval to irregular, with finely stippled chromatin and 1–2 variably prominent nucleoli. Anisocytosis and anisokaryosis are mild, and mitoses are 4 in 10 hpf.

### **Pig 2**

#### *Right ear*

Within the subcutis and skeletal muscle, there is an unencapsulated, moderately demarcated and mildly infiltrative neoplasm composed of nests and packets of neoplastic cells on a fine fibrovascular stroma. Neoplastic cells are polygonal, with variably distinct cell borders and moderate-to-large amounts of pale eosinophilic vacuolated cytoplasm. Nuclei are round to oval to irregular and vesicular, with one generally prominent magenta nucleolus. Anisocytosis and anisokaryosis are mild to moderate, and mitoses are 1 in 10 hpf.

The neoplasm is surrounded by small numbers of lymphocytes and rare plasma cells.

#### *Left ear*

Within the deep dermis and subcutis, and extending into the adjacent skeletal muscle, is an unencapsulated, moderately demarcated and mildly infiltrative neoplasm composed of nests and short streams of neoplastic cells within a moderate amount of fibrovascular stroma. Neoplastic cells are polygonal to spindloid, with indistinct cell borders and a small amount of vacuolated eosinophilic cytoplasm. Nuclei are round to oval to irregular, with finely stippled chromatin and 1–2 variably prominent nucleoli. Anisocytosis and anisokaryosis are moderate, and mitoses are 4–7 per hpf and often bizarre.

### **Pig 3**

#### *Right ear*

Within the dermis, subcutis, and skeletal muscle, there is an unencapsulated, poorly demarcated and infiltrative neoplasm composed of nests and packets of neoplastic cells on a fine fibrovascular stroma. Neoplastic cells are polygonal, with variably distinct cell borders and a small to moderate of pale eosinophilic-to-amphophilic vacuolated cytoplasm. Nuclei are round to oval to irregular and vesicular, with one-to-multiple variably prominent nucleoli. Anisocytosis and anisokaryosis are moderate, and mitoses are <1 in 10 hpf.

#### *Left ear*

The deep dermis and subcutis contain an unencapsulated, moderately demarcated neoplasm composed of densely packed nests and short streams of neoplastic cells within a moderate amount of fibrovascular stroma. Neoplastic cells are polygonal to spindloid, with indistinct cell borders and a small amount of vacuolated eosinophilic cytoplasm. Nuclei are round to oval to irregular, with finely stippled chromatin and 1–2 variably prominent nucleoli. Anisocytosis and anisokaryosis are moderate, and mitoses are 2–5 per hpf and often bizarre.
